# Supplementary material for: Origins of possible synergistic effects in the interactions between metal atoms and MoS2/graphene heterostructures for battery applications
Source: Royal Society of Chemistry journal article supplement (doi:10.1039/c8cp02740d), 2018-01-01
Supplement: c8cp02740d1.pdf [file c8cp02740d1.pdf]

# Ab initio study of MoS<sub>2</sub>-graphene heterostructure for metal atoms intercalation

Jiaxin Fan<sup>a</sup>, Jack Yang<sup>a,b,\*</sup>, Anh Pham<sup>a,c</sup> and Sean Li<sup>a</sup>

- School of Materials Science and Engineering, The University of New South Wales, NSW 2052, Australia
- Australian Nuclear Science and Technology Organization, New Illawarra Road, Lucas Heights, New South Wales 2234, Australia
- Anh's new affiliation

\*Corresponding author, Email: [jianliang.yang1@unsw.edu.au](mailto:jianliang.yang1@unsw.edu.au)

## Supporting Information

G<sub>side</sub>:

Al

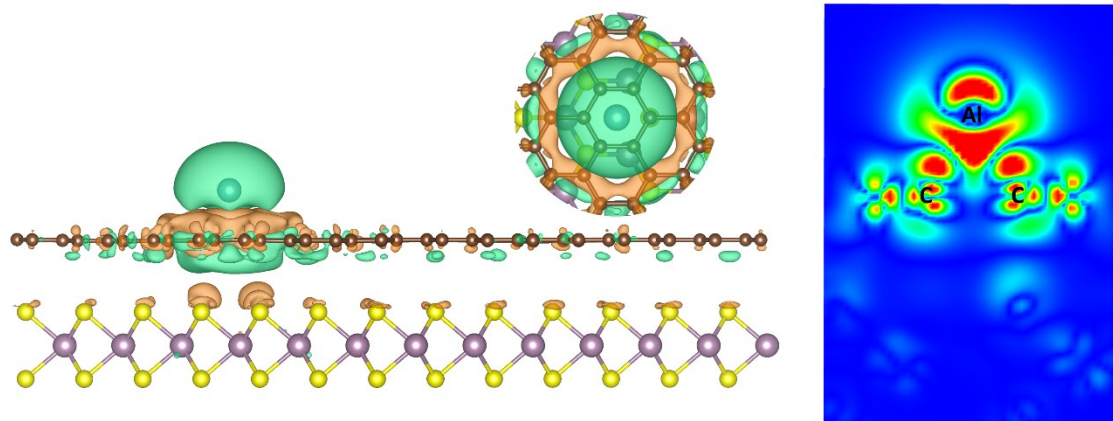

Ca

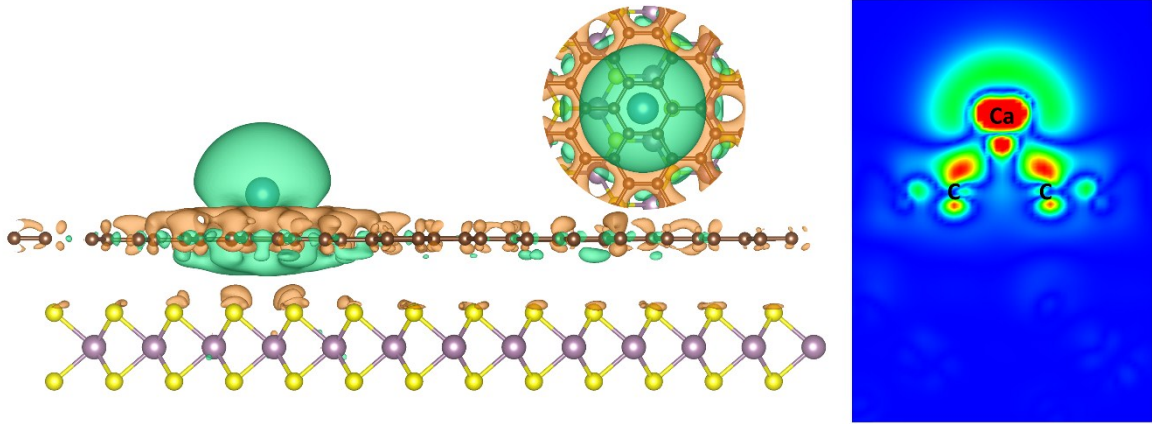

K

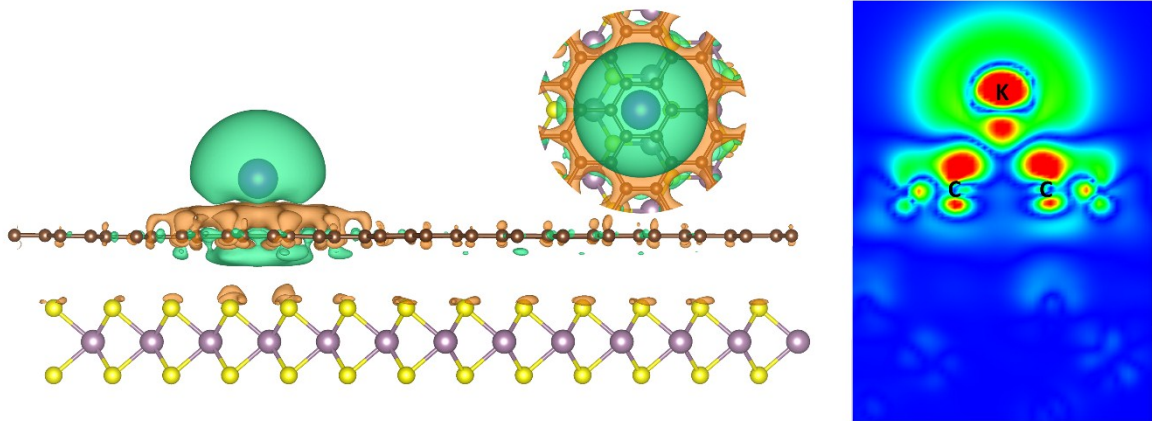

Li

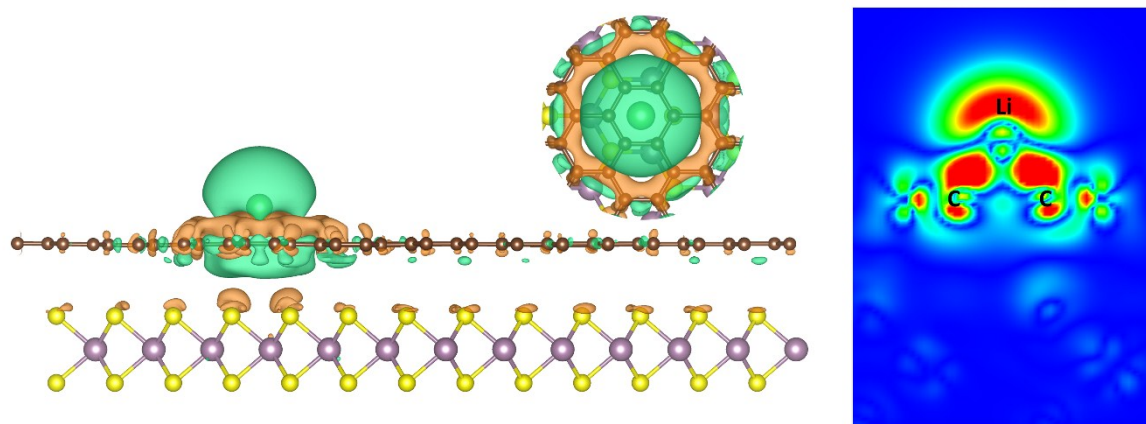

Mg

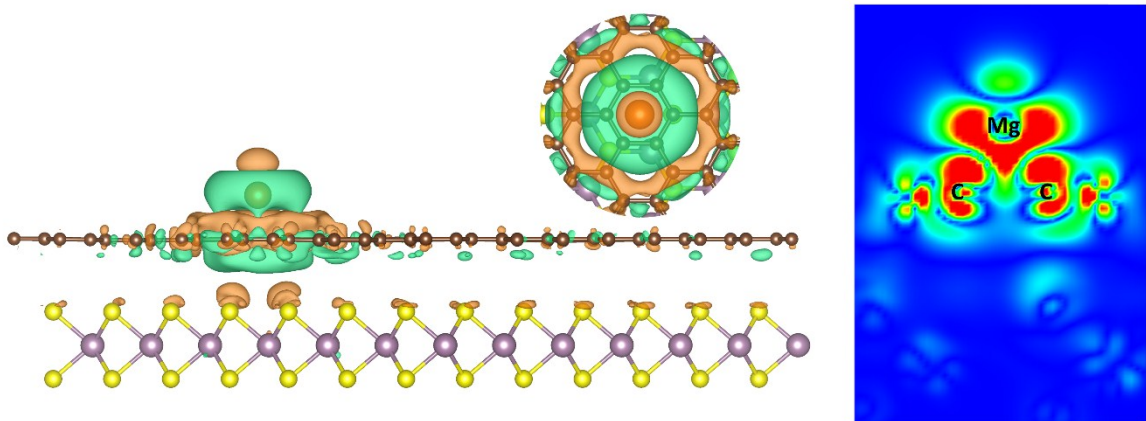

Na

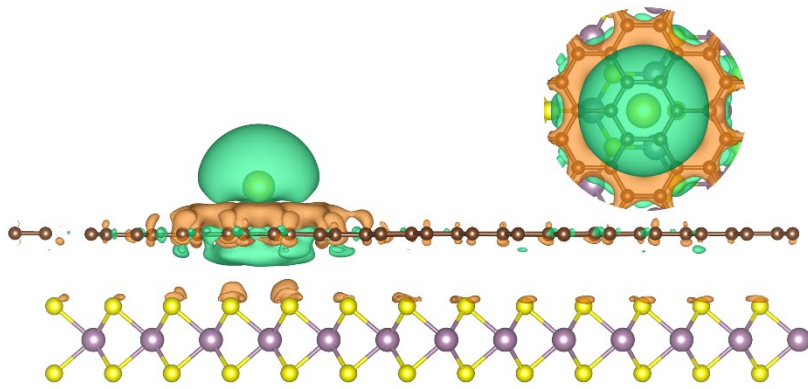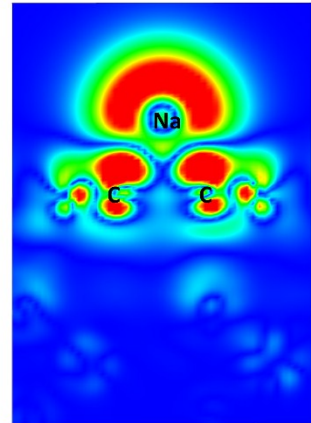

Interlayer:

Al

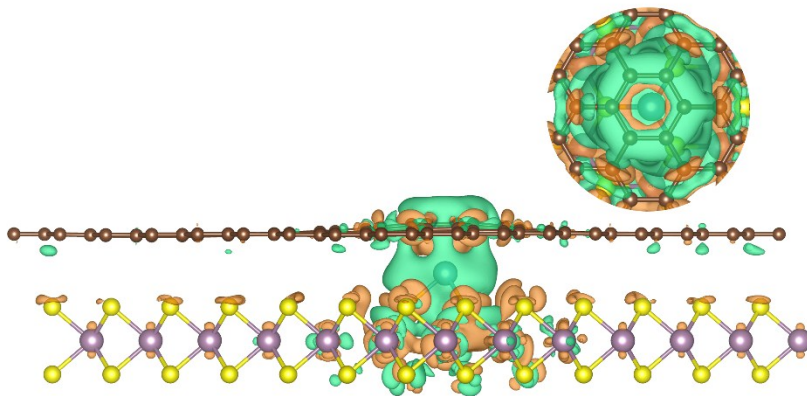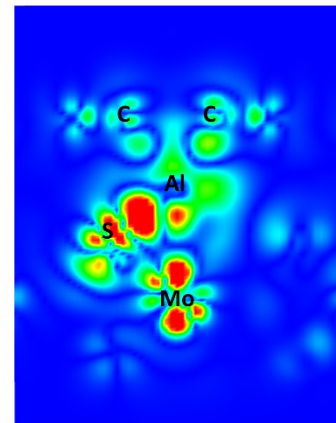

K

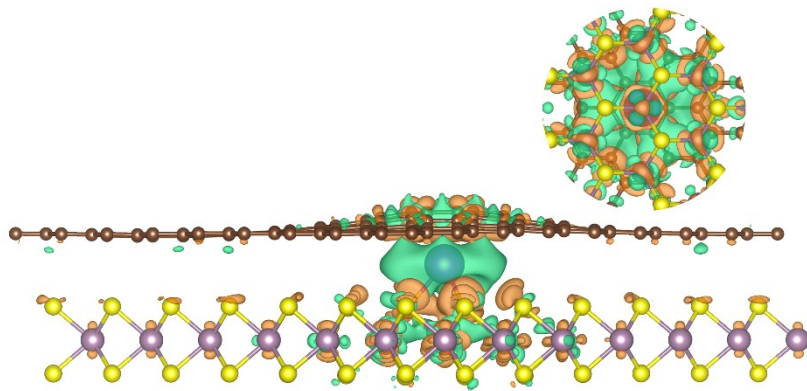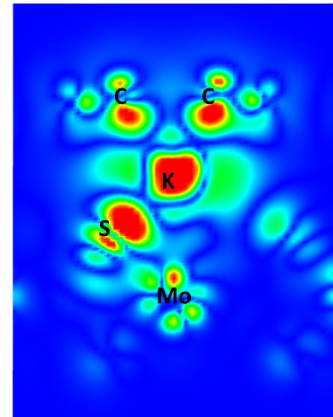

Mg

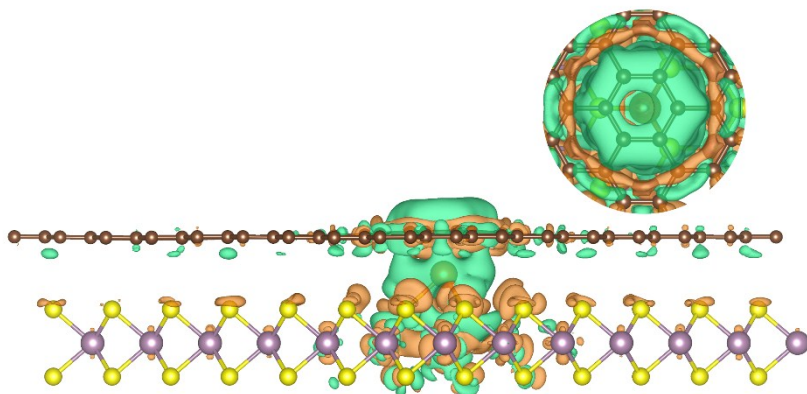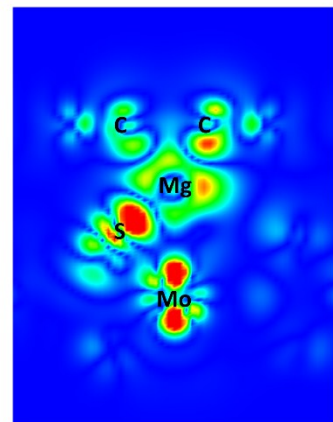



Na

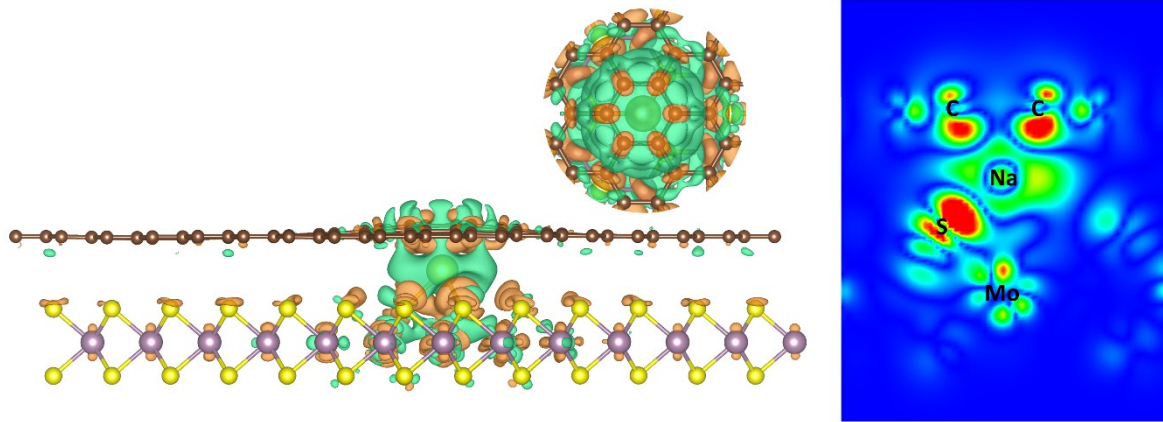

MoS<sub>2</sub> side:

Al

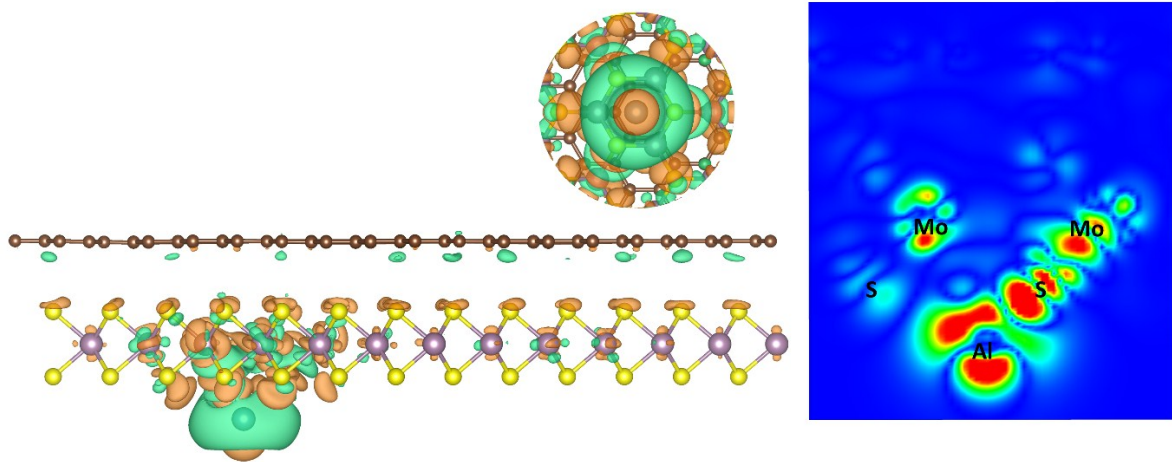

K

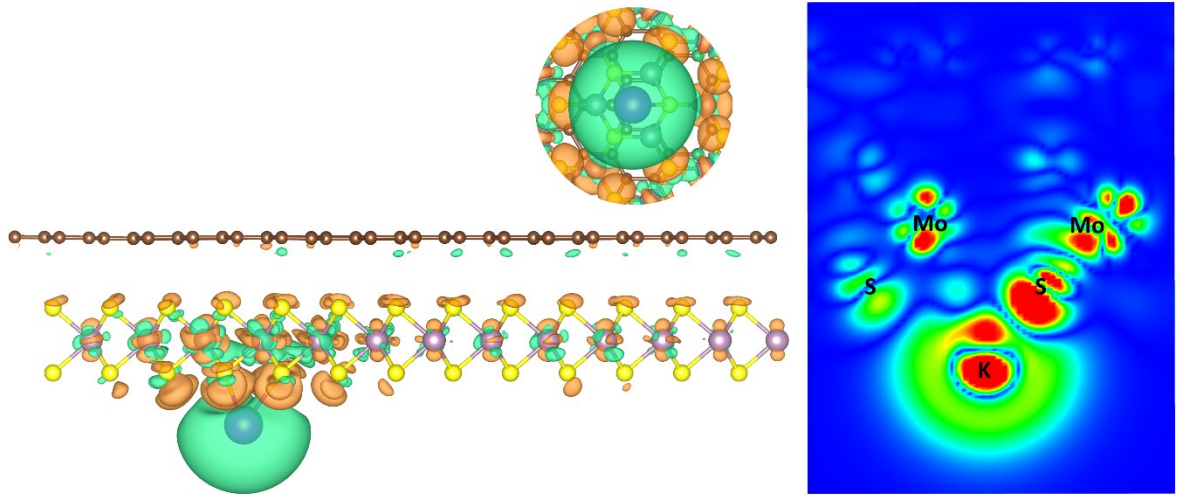

Mg

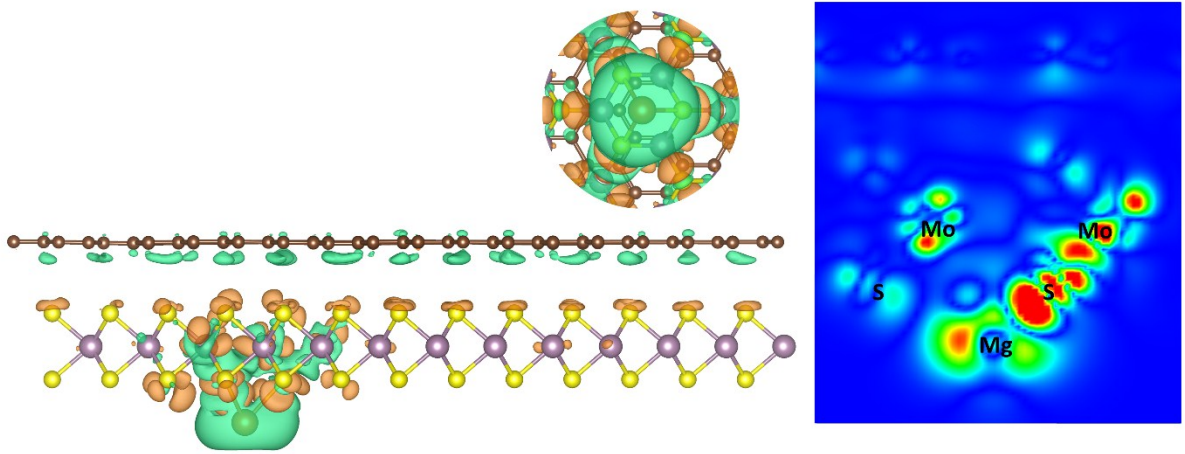

Na

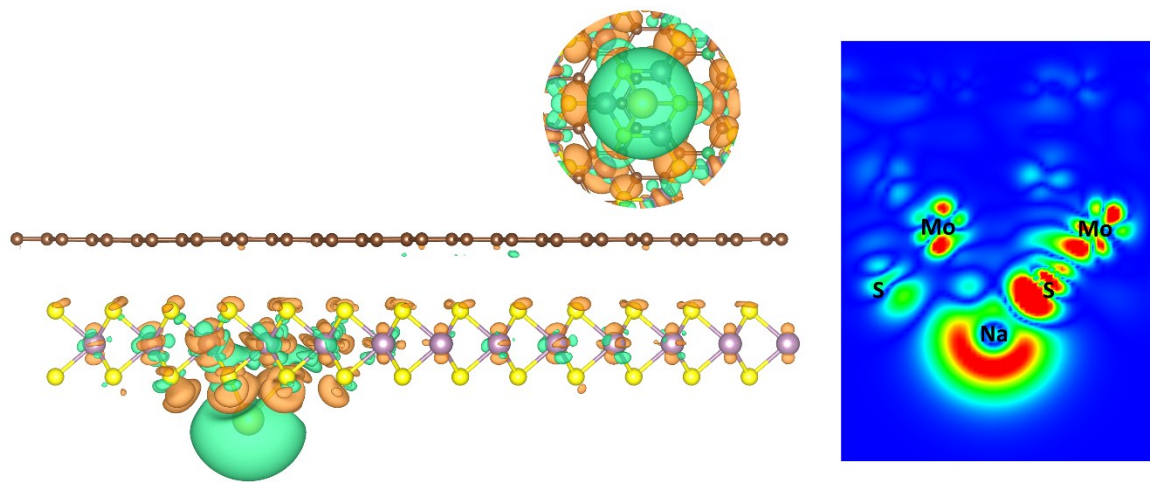

Fig.1 Vertical and horizontal (up view for situation (i) and (ii); bottom view for situation (iii)) views of charge density difference for adatoms in different regions. The (1, -1, 0) lattice plane is chosen for 2D mapping. The (1, -1, 0) lattice plane is chosen for 2D mapping. The isosurface is set to 0.0003. Orange and green represent electrons accumulation and depletion respectively.
